1 **Multilevel and sex-specific selection on competitive traits in**  
2 **North American red squirrels**

3 David N. Fisher<sup>1\*</sup>, Stan Boutin<sup>2</sup>, Ben Dantzer<sup>3,4</sup>, Murray M. Humphries<sup>5</sup>, Jeffrey E. Lane<sup>6</sup> and  
4 Andrew G. McAdam<sup>1</sup>

5 1. Department for Integrative Biology, University of Guelph, Guelph, Ontario N1G 2W1,  
6 Canada

7 2. Department of Biological Sciences, University of Alberta, Edmonton, Alberta T6G 2E9,  
8 Canada

9 3. Department of Psychology, University of Michigan, Ann Arbor, Michigan 48109-1043,  
10 USA

11 4. Department of Ecology and Evolutionary Biology, University of Michigan, Ann Arbor,  
12 Michigan 48109-1043, USA

13 5. Natural Resource Sciences, Macdonald Campus, McGill University, Ste-Anne-de-  
14 Bellevue, Québec H9X 3V9, Canada

15 6. Department of Biology, University of Saskatchewan, Saskatoon, Saskatchewan S7N 5E2,  
16 Canada

17 \*corresponding author: [davidnfisher@hotmail.com](mailto:davidnfisher@hotmail.com)

18

19 Running head: Multilevel selection in a wild mammal

20

21 Key words: multilevel selection, natural selection, North American red squirrel, selection  
22 coefficient, spatial scale, *Tamiasciurus hudsonicus*

23

24 Data archival: the data set is archived on Dryad (info XXX), with a five-year embargo from  
25 the date of publication.

## 26 Abstract

27

28 Individuals often interact more closely with some members of the population (e.g. offspring,  
29 siblings or group members) than they do with other individuals. This structuring of  
30 interactions can lead to multilevel natural selection, where traits expressed at the group-level  
31 influence fitness alongside individual-level traits. Such multilevel selection can alter  
32 evolutionary trajectories, yet is rarely quantified in the wild, especially for species that do not  
33 interact in clearly demarcated groups. We quantified multilevel natural selection on two traits,  
34 postnatal growth rate and birth date, in a population of North American red squirrels  
35 (*Tamiasciurus hudsonicus*). The strongest level of selection was typically within-acoustic  
36 social neighbourhoods (within 130m of the nest), where growing faster and being born  
37 earlier than nearby litters was key, while selection on growth rate was also apparent both  
38 within-litters and within-study areas. Higher population densities increased the strength of  
39 selection for earlier breeding, but did not influence selection on growth rates. Females  
40 experienced especially strong selection on growth rate at the within-litter level, possibly  
41 linked to the biased bequeathal of the maternal territory to daughters. Our results  
42 demonstrate the importance of considering multilevel and sex-specific selection in wild  
43 species, including those that are territorial and sexually monomorphic.

44

## 45 Introduction

46

47 Phenotypic selection measures the association between individuals' traits and some aspect  
48 of their fitness. Measures of the strength and mode of selection provide insights into the  
49 function of specific traits (Arnold 1983) and allow for predictions of how these traits might  
50 evolve across subsequent generations (Robertson 1966; Price 1970; Lande 1979; Falconer  
51 1981; Lande and Arnold 1983). More broadly, the thousands of estimates of selection in the  
52 wild provide general lessons about the way selection often works in nature (Endler 1986;  
53 Kingsolver et al. 2001; Smith and Blumstein 2008; Cox and Calsbeek 2009; Siepielski et al.  
54 2009, 2013).

55 Almost all of these estimates consider selection as acting directly on an individual's  
56 absolute trait value or value relative to the population mean. However, individuals often  
57 interact more closely with those in their immediate environment; for instance bird nestlings  
58 compete with their siblings for access to food brought by the parents (Werschkul and  
59 Jackson 1979; Royle et al. 1999). When ecological conditions cause individuals to interact  
60 more closely with some conspecifics than others, multilevel associations between traits and  
61 fitness can arise. Under these conditions, fitness is influenced not only by the trait value of

62 the individual, but also the trait values of litters, broods or social groups (Goodnight et al.  
63 1992). Such multilevel selection has been shown to be equivalent to kin-selection and  
64 “neighbour-modulated selection”, where individuals influence each other’s fitness (Grafen  
65 1984; Queller 1992; Bijma et al. 2007; Bijma and Wade 2008; but see: van Veelen et al.  
66 2012), and may or may not correlate with selection at the level of the individual (Goodnight  
67 et al. 1992). For instance, it might be beneficial for a chick to beg more loudly than its nest-  
68 mates to receive more food from the parents, but louder nests may suffer higher predation  
69 rates. The evolutionary consequences of multilevel selection are potentially striking; higher-  
70 level selection in the same direction as individual-level selection can increase the rate of the  
71 evolutionary response, but higher-level selection in the opposite direction can retard,  
72 remove, or even reverse evolutionary response to selection (Bijma and Wade 2008).

73 Standard measures of selection represent how trait variation across individuals  
74 relates to among-individual variation in relative fitness. These can be measured as fitness-  
75 trait covariances (selection differential; Lush 1937; Falconer 1981) and partial regression  
76 coefficients (selection gradient; Lande 1979; Lande and Arnold 1983). For example, a  
77 selection gradient is given by:

78  
79

$$80 \quad w_i = \text{constant} + \beta_{w_D,P} P_i + e_i \quad (1)$$

81  
82

83 Where  $w_i$  is individual  $i$ 's relative fitness,  $P_i$  is  $i$ 's phenotype,  $\beta_{w_D,P}$  is the partial regression  
84 coefficient of  $P_i$  on  $w_i$  and  $e_i$  is a residual term. We use the notation from Bijma and Wade  
85 (2008) for consistency with later sections. The  $D$  in  $\beta_{w_D,P}$ , indicates the effect is direct in that  
86 it is the phenotype of individual  $i$  influencing its own relative fitness. A single regression  
87 coefficient,  $\beta_{w_D,P}$ , is calculated across the whole population under investigation. This implies  
88 that the component of an individual's trait that is relevant to its relative fitness is its deviation  
89 from the population mean.

90 In contrast, in the context of multilevel selection, an individual's trait can be modelled  
91 as both a deviation from its own group mean, and the deviation of the group mean  
92 phenotype from the global mean phenotype (also called "contextual analysis"; Heisler and  
93 Damuth 1987; Goodnight et al. 1992; Goodnight and Stevens 1997). An alternative is the  
94 “neighbour-modulated” or “social selection” approach, where individual phenotype values,  
95 and the mean of their neighbours (i.e. the mean of the group excluding the focal individual)  
96 are used to predict fitness (Wolf et al. 1999; McGlothlin et al. 2010). Both Queller (1992) and

97 Bijma and Wade (2008) have shown these approaches are equivalent; we use the former for  
98 consistency with recent work on this topic by Bouwhuis et al. (2015).

99 Both among-individual and among-group variation may be important in determining  
100 fitness. In this case, selection is modelled with two terms:  $i$ 's group mean (including  $i$ ),  $\bar{P}_{gi}$ ,  
101 and that individual's deviation from the group mean  $\Delta P_i$  (Bijma and Wade 2008). A multilevel  
102 selection analysis can, therefore, quantify both the among-group selection gradient,  $(\beta_{w,\bar{P}_{gi}})$ ,  
103 and the within-group selection gradient  $(\beta_{w,\Delta P_i})$  using standard multiple regression methods  
104 for estimating selection gradients (Lande & Arnold 1983):

105

106

$$107 \quad w_i = \text{constant} + \beta_{w,\bar{P}_{gi}}\bar{P}_{gi} + \beta_{w,\Delta P_i}\Delta P_i + e_i \quad (2)$$

108

109

110 This simple two-level selection model then assumes that all groups within the population  
111 equally interact with one another. However, if some groups are clustered into a higher  
112 hierarchical level of organization (e.g. groups that share a local neighbourhood might interact  
113 more strongly) then relationships between group mean traits and group mean fitness might  
114 vary among these higher levels of organization. Therefore, the basic multilevel selection  
115 approach can be extended across any number of hierarchical levels of organization  
116 (Goodnight et al. 1992; Bijma et al. 2007).

117 Whilst debate over multilevel selection continues (Gardner 2015; Goodnight 2015),  
118 empirical data for its action is gathering. For example, Bouwhuis et al. (2015) found  
119 covariance between fledging mass and survival at the between-year, within-year and within-  
120 brood levels in great tits (*Parus major*), with the covariance being strongest at the broadest  
121 scales. Similarly, selection has been observed at various different levels in different systems,  
122 including among honey bee (*Apis mellifera*) colonies (Page and Fondrk 1995), among pairs  
123 of monogamous collared flycatchers (*Ficedula albicollis*) (Björklund and Gustafsson 2013),  
124 among pens of captive Japanese quail (*Coturnix japonica*) (Muir et al. 2013), among groups  
125 of jewelweed plants (*Impatiens capensis*) (Stevens et al. 1995), while contrasting individual  
126 and group-level selection was observed in water strider (*Aquarius remigis*) groups (Eldakar  
127 et al. 2009, 2010).

128 These examples portray organisms interacting in relatively clearly defined groups, yet  
129 animals do not always interact in such discrete units. For example populations of territorial  
130 animals consist of individuals aggregated at a range of spatial scales, from individual  
131 territories, to groups of neighbouring territories to entire populations (Coulson et al. 1997).  
132 Selection presumably could act at each of these levels simultaneously, and possibly in

133 differing directions, but this is rarely investigated. Laiolo and Obeso (2012) found there was  
134 disruptive selection at the level of the individual for song repertoire in Dupont's lark  
135 (*Chersophilus duponti*), but when selection on “neighbourhoods” (small populations  
136 containing 2-50 territories) was considered, selection on song repertoire was found to be  
137 stabilising. This demonstrates that non-discrete units can be a basis for selection. Nunney  
138 (1985) similarly demonstrated such “continuous arrays” of animals can be the basis for  
139 selection for altruism as they are when structured in “trait groups”.

140 Therefore, the key question is not whether multilevel selection is possible, but its  
141 form and strength across systems in the natural world (Biernaskie and Foster 2016).  
142 Aggregating estimates that included scales at which there might be no genetic variance in  
143 the trait might lead to an under-estimation of evolutionary change (if estimates cancel out as  
144 they are in opposing directions) or an over-estimation of evolutionary change (if the levels of  
145 selection are in the same direction). This may help us explain the inaccuracy of our  
146 predictions of evolutionary responses to selection on heritable traits (Merilä et al. 2001).  
147 Additionally, sexually antagonistic selection is quite common, and may also pose a  
148 constraint on evolution (Cox and Calsbeek 2009). However, it is unknown whether this  
149 antagonistic selection extends to multiple levels.

150 To study multilevel selection in an animal interacting in non-discrete groups, we  
151 focused on recruitment in a wild population of North American red squirrels (*Tamiasciurus*  
152 *hudsonicus*, hereafter “red squirrels”). Red squirrels defend exclusive, food-based territories  
153 centred on a cache of hoarded white spruce (*Picea glauca*) cones (Smith 1968). Most of the  
154 variation in lifetime reproductive success is determined by whether or not squirrels acquire a  
155 territory during their first year before winter commences (McAdam and Boutin 2003b;  
156 McAdam et al. 2007). Juveniles cannot oust adults from their territories, so they must find  
157 vacant territories or, if resource availability is high, create new ones (Price and Boutin 1993),  
158 suggesting that the population density is a key ecological agent of selection (Dantzer et al.  
159 2013; Taylor et al. 2014). In most cases, juveniles leave their natal territory in search of  
160 vacant territories, ranging on average around 90m, although occasionally up to 900-1000m  
161 away from the natal territory (Price and Boutin 1993; Larsen and Boutin 1994; Berteaux and  
162 Boutin 2000). However, in some cases the mother will “bequeath” all or part of her territory to  
163 one of her offspring, typically a daughter, and search for a vacant territory herself (Price and  
164 Boutin 1993; Larsen and Boutin 1994; Berteaux and Boutin 2000; Lane et al. 2015).

165 Mean litter size in red squirrels is between three and four but can range from one to  
166 seven (McAdam et al. 2007). Therefore, there is potential for competition within a litter for  
167 maternal resources, nearby available territories, or for access to the mother's territory if she  
168 leaves it. Furthermore, each litter is in competition with the other litters in adjacent territories  
169 for vacant territories. Given the distance squirrels can range in search of vacant territories

170 (see above) there is possibly selection at greater spatial scales, for example amongst the  
171 young-of-the-year for the few unoccupied territories in the area covered by several territories  
172 (“neighbourhoods”), and for competition among neighbourhoods for access to vacant  
173 territories within a study area (a rectangular grid of around 40 hectares, here representing a  
174 sub-population). Finally, within each year the population is comprised of multiple study  
175 areas, so there is possibly selection among these large spatial scales. This creates the  
176 opportunity to investigate the strength of selection at different spatial scales: within-litters,  
177 within-social neighbourhoods, within-study areas and within-years (amongst-study areas in  
178 each year). As claiming a vacant territory is our suggested mode of competition (Taylor et al.  
179 2014), we investigated selection on two traits that are relevant to this ability: birth date and  
180 growth rate. Earlier born litters presumably are able to start searching for vacant territories  
181 earlier than later ones (Réale et al. 2003a; Williams et al. 2014). A fast growth rate might  
182 mean individuals of a given age have an advantage in terms of size when competing for a  
183 vacancy (McAdam and Boutin 2003b).

184 We pursued three main questions. First, what is the strength of selection on growth  
185 rate and birth date at each of these levels? Ranking each of these levels of selection also  
186 allowed us to identify which was most important to red squirrels. We hypothesized that since  
187 settlement distance is typically short (see above), selection will be strongest at the most local  
188 scales (i.e. within-litters and within-social neighbourhoods). We also compared this multilevel  
189 approach to a standard selection analysis, where we regressed recruitment on individual  
190 growth rates and birth dates relative to the yearly average. Secondly, we sought to  
191 determine whether, and at what scale, a putative agent of selection, the population density of  
192 the study area, affected the direction and magnitude of natural selection. We hypothesized  
193 that selection would be intensified by increased population density, although we did not  
194 predict which scale would show the most density-dependent selection. Third, as sex-biased  
195 patterns of bequeathal may influence selection strengths, we investigated whether these  
196 levels of selection differed between males and females. We did not have any previous  
197 expectations for which sex would experience stronger selection.

198

## 199 **Materials and Methods**

200

### 201 **Study system**

202 We collected data on a wild population of red squirrels in the southwest Yukon, Canada (61°  
203 N, 138° W). We have monitored two adjacent study sites (ca. 40 hectares each), bisected by  
204 the Alaska highway, continuously since 1987. For this study, we restricted our analyses  
205 squirrels born from 1989-2015, as 2015 was the last cohort for which survival data were

206 available. Each year, we live-trapped new individuals (Tomahawk Live Trap, Tomahawk, WI,  
207 USA) and gave them unique ear-tags, identified females with litters and ear-tagged their  
208 pups, and conducted censuses (using complete enumeration) to ascertain the location and  
209 survival of individuals. See McAdam et al. (2007) for further details. These study sites are  
210 patches of good habitat among poorer habitat, and hence are somewhere between “islands”  
211 and arbitrary areas within a continuous range. As red squirrels can live in the surrounding  
212 area, we do see a very low degree of successful emigration from the study area. However,  
213 estimated juvenile survival does not differ between the core and the periphery of the study  
214 areas, indicating rates of dispersal outside of the study areas are not biasing mortality  
215 estimates (McAdam et al. 2007).

216 Female red squirrels typically give birth to litters between March and May. Young are  
217 weaned at approximately 70 days of age (Larsen and Boutin 1994), after which the pups  
218 disperse in search of vacant territories or the mother may bequeath a portion or all of her  
219 territory to one of her pups (Price and Boutin 1993; Larsen and Boutin 1994; Berteaux and  
220 Boutin 2000).

221

#### 222 Data collection

223 To start monitoring pups as soon as they were born, we regularly live-trapped all females  
224 and examined their abdomens and nipples for signs of swelling. We estimated birth date for  
225 each litter based on female stages of pregnancy during live-capture events and the size of  
226 pups once we found them. For each mother we only used the first litter of the year to allow  
227 better comparison among years, as second and third litters are typically only attempted in  
228 “mast” years, in which white spruce (*P. glauca*) produces orders of magnitude more seed  
229 (Kelly 1994; Boutin et al. 2006; Lamontagne and Boutin 2007) or after failed first litter  
230 attempts (McAdam et al. 2007; Williams et al. 2014). To determine their growth rate, we  
231 weighed pups twice while they were still within their natal nest, once at 1-2 days old and  
232 again at about 25 days old. In this time period their growth is approximately linear (McAdam  
233 and Boutin 2003a), so we calculated individual growth rate as the weight difference between  
234 the two measures divided by the number of days between the measures, to give growth rate  
235 in grams of mass gained per day. We excluded records where the first mass was above 50g,  
236 or where the second mass was above 100g, as these were likely to be litters we found late  
237 when pup growth rate is no longer linear. We also excluded records when there were fewer  
238 than five days between weight measurements. Due to their conspicuous territorial behaviour  
239 and our semi-annual censuses of all squirrels, we have nearly perfect knowledge of which  
240 squirrels are still alive in the study areas. Each offspring born in the study areas was  
241 classified as “recruited” or “did not recruit” based on whether they survived beyond 200 days



242 of age (i.e., survived their first winter). This binary variable was used as the response  
243 variable in all our models.

244

#### 245 Data analysis

246 All analyses were conducted in R ver. 3.3.2 (R Development Core Team 2016), with the  
247 package “MCMCglmm” ver. 2.23 (Hadfield 2010). Figures were drawn using coefplot2  
248 (Bolker 2012) and ggplot2 (Wickham 2009). To determine which levels of selection were  
249 strongest, we constructed a logistic regression model, containing terms each representing a  
250 different level of selection. Therefore, all terms (five for growth rate, four for birth date, see  
251 below) were in the same model. The response for the model was the binary variable of  
252 whether the individual recruited or not, and we used a logit link function. This meant we were  
253 restricted to using absolute rather than relative fitness, but we were still able to calculate  
254 selection coefficients, see below. We then calculated each of growth rate and birth date at a  
255 series of levels. The first of these for growth rate was the individual’s growth rate relative to  
256 the mean of its littermates. This represents within-litter selection. There is no such selection  
257 for birth date as all littermates possess the same birth date. The mean of a litter of one was  
258 simply the value for the single individual. The next level for growth rate was the mean growth  
259 rate of its litter relative to the mean growth rate of all individuals born in nests within 130m of  
260 focal nest, representing within-social neighbourhood selection. For birth date we used the  
261 birth date of the litter relative to the mean birth date of all litters within its social  
262 neighbourhood. The radius of the social neighbourhood was set at 130m, as this is the  
263 distance within which squirrels respond to each other’s territorial calls (Smith 1968, 1978), so  
264 represents the acoustic social environment an individual experiences. Furthermore, 130m is  
265 similar to the distance Dantzer et al. (2012) identified (150m) in this system as being the  
266 most relevant for “local” density effects. We repeated the analyses with the social  
267 neighbourhood set at 60 or 200m, and found no qualitative differences in the results (see the  
268 online supporting information). The next level of selection is within-study area. For this we  
269 used the mean growth rate and mean birth date of an individual’s social neighbourhood  
270 relative to the mean for the whole study area. We then modelled within-year selection as the  
271 mean growth rate and birth date for an individual’s study area relative to the mean growth  
272 rate and birth date for the entire year. We also included terms for the year’s mean growth  
273 rate and birth date relative to the global mean (across all years and study areas), to control  
274 for trait-fitness covariances among-years (e.g. Bouwhuis et al. 2015). Only linear terms were  
275 fitted to keep models from getting overly complex and because quadratic terms have  
276 previously been shown to be less important than directional selection for these traits in this  
277 species (McAdam and Boutin 2003b). This method models an individual’s trait as a series of  
278 deviations. For example, an individual with a growth rate of 1.6 g/day might have grown 0.2



279 g/day slower than the average pup in its litter. This average growth rate of the litter (1.8  
 280 g/day) might be 0.3 g/day faster than the average of all litters within the social  
 281 neighbourhood (1.5 g/day). This may be 0.15g/day slower than the study area-wide mean  
 282 (1.65g/day) and 0.2g/day slower than the year-wide mean (1.85g/day). This might be  
 283 0.1g/day faster than the global mean of 1.75g/day. Therefore, we modelled an individual's  
 284 growth rate as the sum of a series of components ( $1.6 = 1.75 + 0.1 - 0.2 - 0.15 + 0.3 - 0.2$ ),  
 285 and estimate selection on each using separate partial regression coefficients:

286

287

$$288 \quad \ln\left(\frac{w_i}{1-w_i}\right) = \text{constant} + \beta_{w,\Delta\bar{P}_Y} \Delta\bar{P}_{Y_m} + \beta_{w,\Delta\bar{P}_S} \Delta\bar{P}_{S_{ml}} + \beta_{w,\Delta\bar{P}_N} \Delta\bar{P}_{N_{mlk}} + \beta_{w,\Delta\bar{P}_L} \Delta\bar{P}_{L_{mlkj}} + \\ 289 \quad \beta_{w,\Delta P} \Delta P_{mlkji} + e_i \quad (3)$$

290

291

292 Note as this is a logistic regression we have shown the response variable as the log odds of  
 293 fitness.  $\Delta\bar{P}_{Y_m}$  represents the difference between the mean growth rate for the year  $m$  that  $i$   
 294 was born and the global mean growth rate.  $\Delta\bar{P}_{S_{ml}}$  is the difference between the mean growth  
 295 rate of  $i$ 's study area  $l$  in year  $m$  and the yearly mean.  $\Delta\bar{P}_{N_{mlk}}$  is the difference between the  
 296 mean growth rate of  $i$ 's social neighbourhood  $k$  in study area  $l$  in year  $m$  and the study area  
 297 mean.  $\Delta\bar{P}_{L_{mlkj}}$  is the difference between the mean growth rate of  $i$ 's litter  $j$  in social  
 298 neighbourhood  $k$  in study area  $l$  in year  $m$  and the neighbourhood mean, and  $\Delta P_{mlkji}$  is the  
 299 difference between  $i$ 's growth rate and the mean of its litter  $j$  in social neighbourhood  $k$  in  
 300 study area  $l$  in year  $m$ .  $\beta_{w,\dots}$  terms are the partial regression coefficients for each component  
 301 of growth rate on fitness. These logistic regression coefficients were converted into selection  
 302 coefficients, following Janzen and Stern (1998), to allow comparison with other studies (e.g.  
 303 Kingsolver *et al.* 2001). This is similar to Bouwhuis *et al.*'s (2015) analysis on brood mass  
 304 and survival in great tits (*Parus major*), although for growth rate we have two additional  
 305 levels (within-social neighbourhood and within- study area). The same formulation was used  
 306 for birth date, except that there was no within-litter selection. We mean-centred each  
 307 continuous fixed effect and transformed it by dividing by the variable's standard deviation,  
 308 giving each variable a variance of 1. This allowed the effect sizes to be directly compared  
 309 (Schielzeth 2010). Therefore, by directly comparing the magnitude of the coefficients for  
 310 each level of growth rate and birth date, we were able to identify the levels at which selection  
 311 acted most strongly.

312 Each model also included study area as a fixed effect to control for any variation in  
 313 survival between the two study areas. We also entered the random effect of year, and the  
 314 random effects of litter ID nested within mother ID. These accounted for variation in

315 recruitment among years, among litters and among mothers beyond the levels of growth rate  
316 and birth date we are studying. As each social neighbourhood was uniquely calculated there  
317 was no replication of each social neighbourhood, and so we did not include a random effect  
318 for this level. The priors for the variance components followed an inverse-gamma distribution  
319 ( $V = 1$ ,  $\nu = 0.002$ ), with the residual variance fixed at 1, because in a model with a binary  
320 response the residual variance is defined by the mean. Models were run for 200,000  
321 iterations, with the first 50,000 discarded and then 1/10 of the remaining iterations used for  
322 parameter estimation, to reduce the influence of autocorrelation between successive  
323 iterations. Trace plots of the model parameters were checked and a Gelman test for  
324 stationarity was used to confirm stable convergence had been achieved ( $p > 0.156$  in all  
325 cases). We report the posterior distribution mode (PDM) for each parameter, and the 95%  
326 credible intervals (CIs) for this estimate. Our model for the standard selection analysis  
327 included individual traits relative to the yearly mean, and the yearly mean relative to the  
328 overall mean, as levels of growth rate and birth date. Otherwise the model structure was the  
329 same.

330

#### 331 Population density an agent of selection

332 To test whether population density acted as an agent of selection (Dantzer et al. 2013;  
333 Taylor et al. 2014), we took the multilevel model built previously, and added study area  
334 population density (number of live adult squirrels per hectare in that study area in that year)  
335 as a fixed effect. We interacted this effect with each level of growth rate and birth date in the  
336 model, to see how the influence of these competitive traits varied as density changed  
337 (Bouwhuis et al. 2015). As before, we mean centred study area density and divided it by the  
338 variable's overall standard deviation. Marginal  $R^2$ s (the proportion of total variance explained  
339 by the fixed effects) were calculated for each model (Nakagawa and Schielzeth 2013) to  
340 determine the change in explanatory power adding our agent of selection had brought.

341

#### 342 Sex-specific selection

343 We added sex as a fixed effect and the interaction between sex and each level of growth  
344 rate and birth date to the first model for multilevel selection (without study area density) to  
345 test for sex-specific selection. As sex is a two-level factor, we modelled females as the  
346 default and males as a contrast, giving the regression estimate for females and the deviation  
347 at each level for males. Note the values for each level of the traits are still relative to the  
348 mean of all individuals in the level above, including both sexes.

349

## 350 Results

351

352 Across both study areas in all years (1989-2015) there were 2647 juveniles born that had a  
353 known growth rate and birth date at each level. These came from 935 litters from 547 mother  
354 squirrels. 26% of these juveniles survived to 200 days. Social neighbourhoods contained a  
355 median of four litters (range: 1 – 22) and a median of 11 juveniles (range 1 – 60).

356

### 357 Levels of selection

358 Selection on growth rate was positive at all levels, but was strongest within-neighbourhoods  
359 and became weaker at both smaller (within-litter selection) and larger hierarchical scales  
360 (Fig. 1). There was also a positive among-year effect, such that years with higher growth  
361 rate had higher average recruitment. None of the levels of birth date experienced consistent  
362 selection, but there was a strong, positive among-year relationship; years where the mean  
363 birth date was later had higher recruitment. There was considerable variation among-years in  
364 recruitment (PDM = 0.749, CIs = 0.376 to 1.60), essentially no variation among-mothers in  
365 recruitment (PDM = 0.02, CIs = <0.001 to 0.350), and a large amount of variation among-  
366 litters (PDM = 1.26, CIs = 0.744 to 1.98). There was no difference in juvenile recruitment  
367 between the two study areas (PDM = -0.164, CIs = -0.471 to 0.194). The standard selection  
368 analysis indicted positive selection on growth rate (PDM = 0.330, CIs = 0.130 to 1.25) but no  
369 overall selection on birth date (PDM = -0.066, CIs = -0.198 to 0.089). From Fig. 1 it is  
370 apparent that these values represent an aggregation of the different levels of the multilevel  
371 analysis.

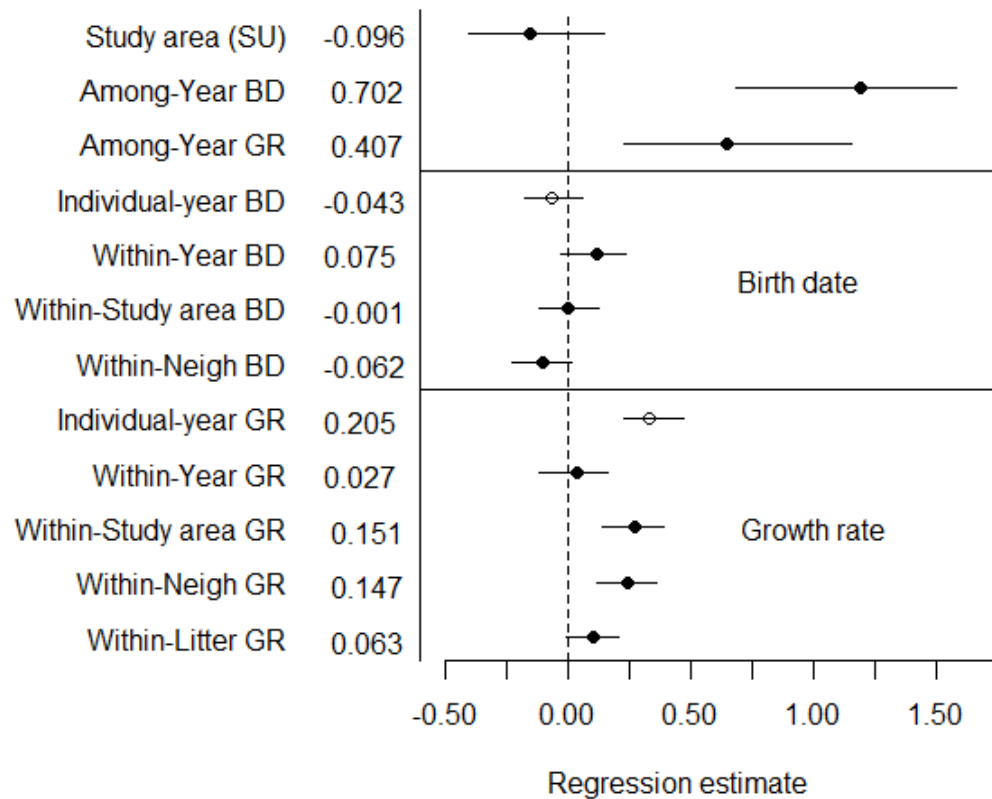

372

373 Figure 1. Regression estimates and their 95% credible intervals for the influence of different  
 374 levels of growth rate (GR) and birth date (BD) on the recruitment of juvenile red squirrels.  
 375 Also given are the selection coefficients for each trait, obtained following Janzen and Stern  
 376 (1998). Estimates from the multilevel analysis are indicated with solid points, while the  
 377 estimates from the standard selection analysis (“Individual-year” terms) are indicated with  
 378 open circles. Continuous variables have been transformed to the same scale, so effect sizes  
 379 and selection coefficients are directly comparable. Study area is modelled as a two-level  
 380 factor, with “Kloo” as the default, and so the effect here shows the difference in the “Sulphur”  
 381 (SU) study area.

382

383 Agent of selection

384 Years with high population density experienced stronger within-neighbourhood selection for  
 385 earlier birth dates. To a lesser degree, within-study area selection on birth date also  
 386 increased with population density. Within-year selection on birth date, and all levels of  
 387 selection on growth rate did not vary with changing population density (Table 1). For the  
 388 majority of our traits (7/9), increasing density increased the strength of selection, as the  
 389 coefficient for the interaction was of the same sign as for the main effect. However, only for  
 390 within-neighbourhood selection on birth date did the interaction term not overlap with zero,  
 391 although the interaction for within-study area selection on birth date only marginally  
 392 overlapped zero. Adding the fixed effect of study area density, and its interaction with all

393 levels of growth rate and birth date, improved the model fit by 42% (without study area  
394 density model  $R^2 = 0.144$ , with study area density model  $R^2 = 0.204$ ).

395

396 Table 1. Posterior distribution mode (PDM) for the estimate of the main effect of each level  
397 of growth rate and birth date, and the PDM for the interaction with each effect and study area  
398 adult squirrel density (with 95% credible intervals [CIs] in parentheses). Effects for which the  
399 CIs did not cross zero are highlighted in bold. When the trait main effect and the interaction  
400 between density and the trait act in the same direction then increased density resulted in  
401 stronger selection.

| Trait              | Effect                | PDM of main effect               | PDM of interaction               | Same direction? |
|--------------------|-----------------------|----------------------------------|----------------------------------|-----------------|
| <b>Growth rate</b> | Within-litters        | 0.094 (-0.029 to 0.226)          | -0.114 (-0.260 to 0.066)         | No              |
|                    | Within-neighbourhoods | <b>0.232</b> (0.094 to 0.383)    | 0.022 (-0.159 to 0.169)          | Yes             |
|                    | Within-study areas    | <b>0.239</b> (0.030 to 0.425)    | 0.007 (-0.194 to 0.223)          | Yes             |
|                    | Within-years          | 0.021 (-0.169 to 0.228)          | 0.103 (-0.181 to 0.384)          | Yes             |
|                    | Among-years           | <b>0.694</b> (0.156 to 1.20)     | -0.287 (-0.806 to 0.294)         | No              |
| <b>Birth date</b>  | Within-neighbourhoods | <b>-0.174</b> (-0.359 to -0.029) | <b>-0.214</b> (-0.476 to -0.002) | Yes             |
|                    | Within-study areas    | -0.131 (-0.288 to 0.095)         | -0.184 (-0.407 to 0.051)         | Yes             |
|                    | Within-years          | 0.169 (-0.057 to 0.340)          | 0.104 (-0.205 to 0.331)          | Yes             |
|                    | Among-years           | <b>1.15</b> (0.534 to 1.71)      | 0.091 (-0.402 to 0.596)          | Yes             |

402

403

404

405 Sex-specific selection

406 Females were more likely to recruit than males (PDM = -0.747, CIs = -1.04 to -0.480; Figs.  
407 2-4). Females that grew faster than their littermates were more likely to recruit, while males  
408 were under very little selection for growth rate at this level (Fig. 2a; PDM = -0.403, CIs = -  
409 0.740 to -0.163). Males and females were under equivalent selection for growth rate within-  
410 social neighbourhoods (Fig. 2b; PDM = -0.023, CIs = -0.314 to 0.211), within-study areas  
411 (Fig. 2c; PDM = -0.117, CIs = -0.415 to 0.107), and within-years (Fig. 2d; PDM = -0.032, CIs  
412 = -0.356 to 0.240). The among-year relationship between mean year growth rate and

413 recruitment was positive in females, but tended to be weaker in males (Fig. 3a; PDM = -  
414 0.407, CIs = -0.656 to 0.064). Males and females were under equivalent selection within-  
415 social neighbourhoods for birth date (Fig. 4a; PDM = 0.053, CIs = -0.186 to 0.326). Females  
416 from neighbourhoods with earlier mean birth dates tended to be more likely to recruit, but the  
417 reverse was true for males (Fig. 4b; PDM = 0.311, CIs = 0.021 to 0.528). Males and females  
418 were under equivalent selection for birth date within-years (Fig. 4c; PDM = 0.024, CIs = -  
419 0.284 to 0.272), but females showed a marginally stronger association between growth rate  
420 and recruitment among-years (Fig. 3b; PDM = -0.297, CIs = -0.657 to 0.061). Sex-specific  
421 regression estimates are plotted in Fig. 5 to aid interpretation.

422

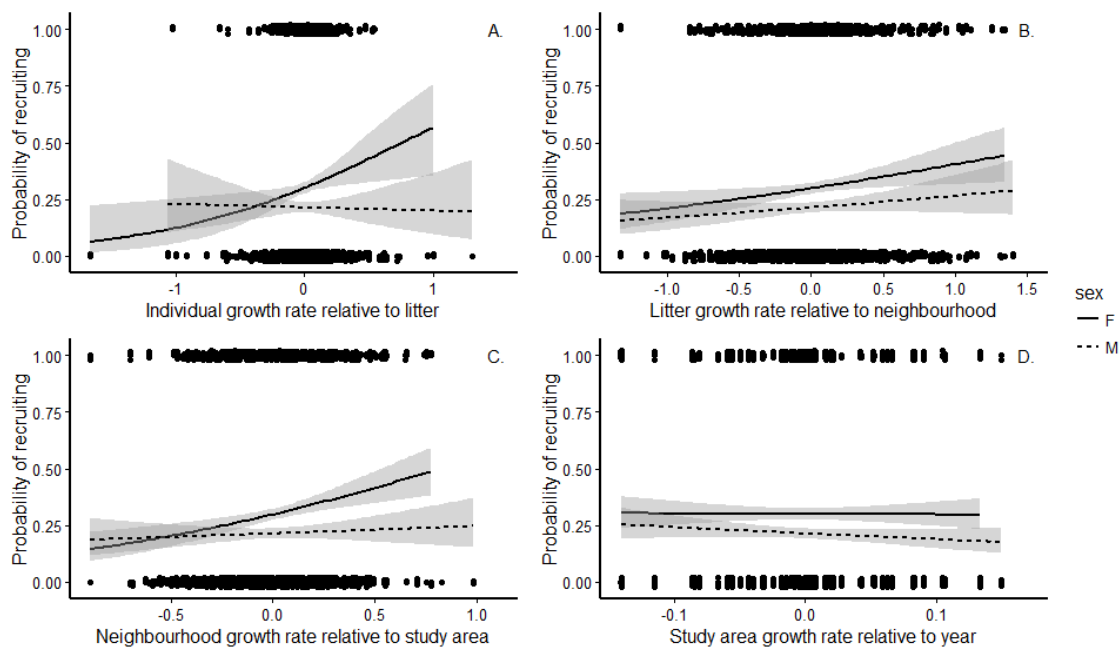

423

424 Figure 2. The influence of different levels of growth rate on juvenile red squirrel recruitment.  
425 A: Individual growth rate relative to the litter's mean growth rate. B: Litter mean growth rate  
426 relative to the social neighbourhood's mean growth rate. C: Mean social neighbourhood  
427 growth rate relative to the study area's mean growth rate. D: Study area mean growth rate  
428 relative to the mean growth rate for that year. Predictions from the model for females are  
429 plotted as a solid line, for males as a dashed line, with the grey areas indicating the standard  
430 errors around the estimates. Points have been moved a small amount at random either up or  
431 down the y-axis to aid viewing, but all were either 0 or 1.

432

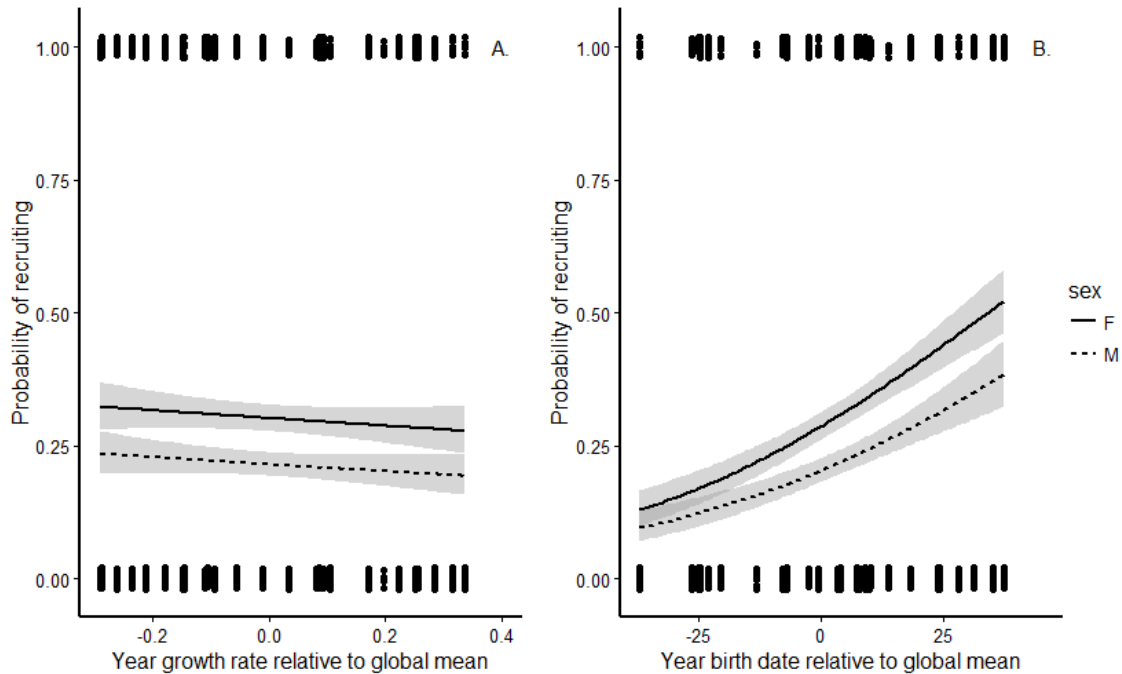

433

434 Figure 3. Among-year effects of A: growth rate, and B: birth date, on juvenile red squirrel  
435 survival. Predictions from the model for females are plotted as a solid line, for males as a  
436 dashed line, with the grey areas indicating the standard errors around the estimates. Points  
437 have been moved a small amount at random either up or down the y-axis to aid viewing, but  
438 all were either 0 or 1.

439

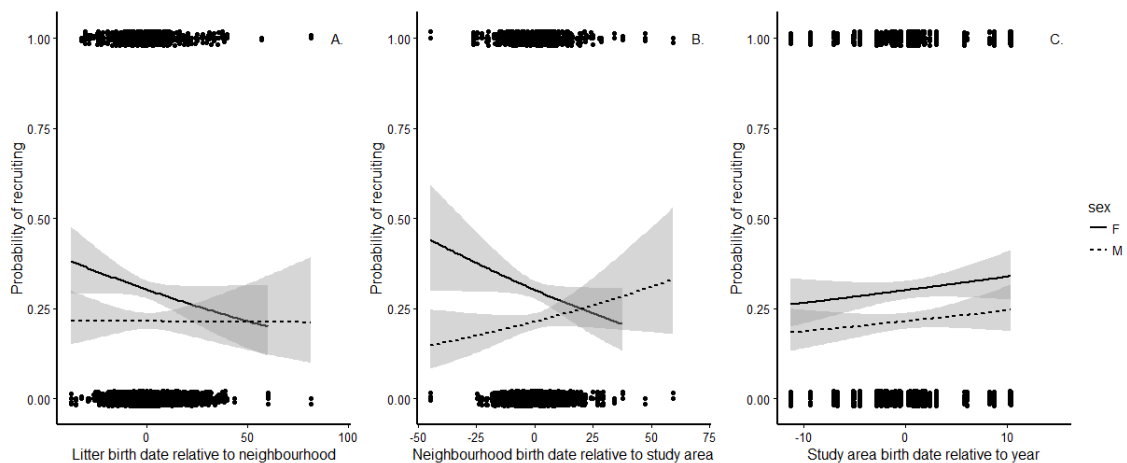

440

441 Figure 4. The influence of different levels of birth date on juvenile red squirrel recruitment. A:  
442 Litter birth date relative to the social neighbourhood's mean birth date. B: Mean social  
443 neighbourhood birth date relative to the study area's mean birth date. C: Study area mean  
444 birth date relative to the mean birth date for that year. Predictions from the model for females  
445 are plotted as a solid line, for males as a dashed line, with the grey areas indicating the  
446 standard errors around the estimates. Points have been moved a small amount  
447 either up or down the y-axis to aid viewing, but all were either 0 or 1.

448



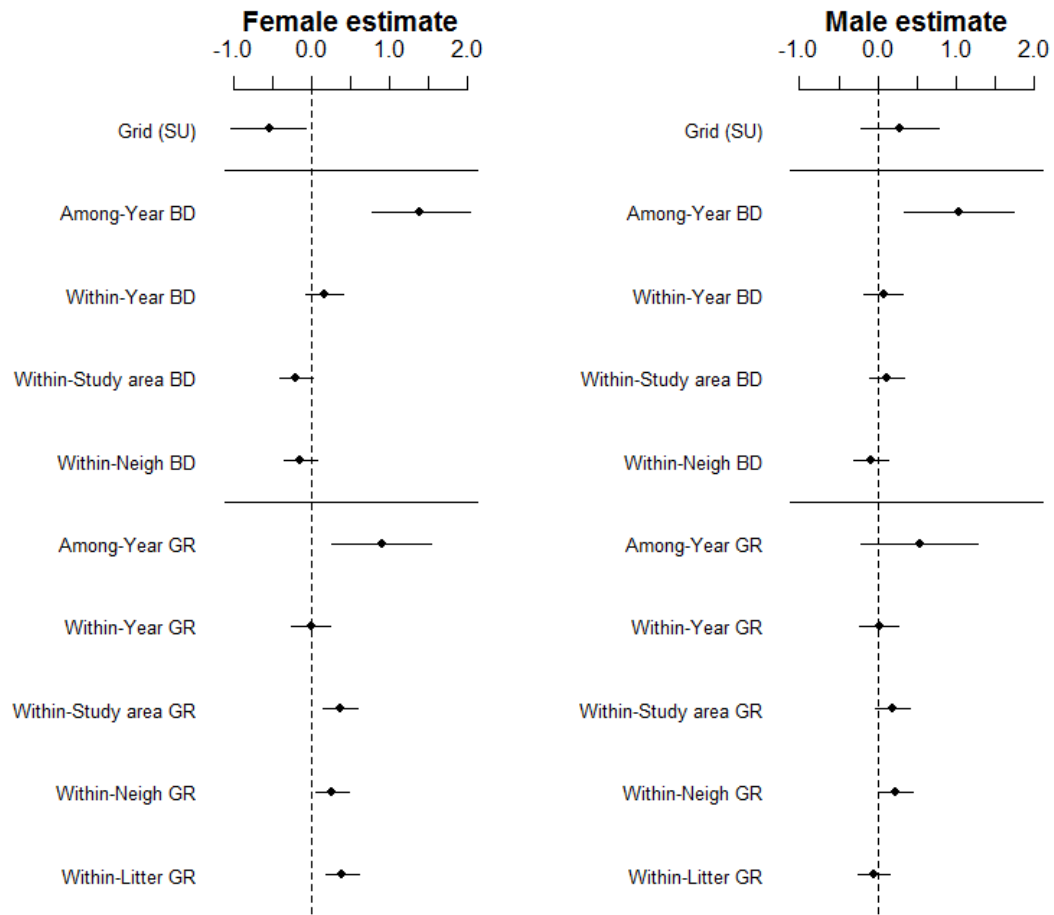

449

450 Figure 5. Regression estimates and their 95% credible intervals for the influence of different  
 451 levels of growth rate (GR) and birth date (BD) on the recruitment of female (left plot) and  
 452 male (right plot) juvenile red squirrels. Note these were modelled in one model using a sex  
 453 interaction term, but are plotted here as separate estimates for clarity. Variables have been  
 454 transformed to the same scale, so effect sizes are directly comparable. Study area is  
 455 modelled as a two-level factor, with “Kloo” as the default, and so the effect here shows the  
 456 difference in the “Sulphur” (SU) study area.

457

## 458 Discussion

459

### 460 Multilevel-selection

461 Natural selection on red squirrel growth rates and birth dates was most prominent for both  
 462 traits within-social neighbourhoods. Being born earlier than neighbouring litters, and/or  
 463 growing faster than them increased the chances of juveniles recruiting. This level of  
 464 selection is above the level of the individual squirrel yet is much more local than selection  
 465 acting across the entire population. Pups who grew faster than their littermates, and from

466 social neighbourhoods that grew faster than others in the study area, were also more likely  
467 to recruit. Consistent selection on birth date was only apparent when we added our putative  
468 agent of selection, study area density, to the model, indicating that an earlier birth date is  
469 primarily beneficial for recruitment when there are many other competing individuals.  
470 Therefore, there are interactions among-litters, within a social neighbourhood that are  
471 important for whether a juvenile red squirrel recruits or not, and these interactions increase  
472 in importance when population density is higher. Consistent selection on birth date was also  
473 not apparent from our standard selection analysis, as this value represents an aggregation  
474 of the within- and among-study area effects, which were in opposite directions. In contrast,  
475 the standard selection analysis did reveal consistent selection favouring faster growth. Our  
476 multilevel selection approach revealed that this overall selection was primarily driven by  
477 selection acting at the more local scales.

478         That the within-neighbourhood scale was the most important (although for females  
479 within-litter selection on growth rate was stronger, see below) suggests differences among-  
480 litters within the social neighbourhood has the largest influence on recruitment in juvenile red  
481 squirrels. An evolutionary response to group selection such as this requires non-zero  
482 relatedness among-group members ( $r > 0$ ), or alternatively for there to be IGEs among  
483 individuals (Bijma and Wade 2008). Litters have a non-zero  $r$  (mean of between 0.25 and 0.5  
484 depending on the number of fathers, notwithstanding any inbreeding) and as such selection  
485 among litters can be expected to result in an evolutionary response. Indeed, previous  
486 research has indicated that the majority of evolutionary potential in our system appears to be  
487 through selection on litter-level characteristics and indirect maternal effects on these  
488 characteristics, as this is where the genetic variance in fitness is (McFarlane et al. 2015) and  
489 where selection is strongest (this study, see also: McAdam et al. 2002; McAdam and Boutin  
490 2004). We also note that the response to selection will be influenced by these maternal  
491 effects and their correlations with other components of maternal fitness (Thomson et al.  
492 2017), which we have not estimated here. Future studies and predictions on the evolutionary  
493 potential of this population should take this in account, as models of evolutionary change  
494 incorporating such indirect effects can lead to counter-intuitive results (Mousseau and Fox  
495 1998; Wolf et al. 1998; Bijma and Wade 2008).

496         Within social-neighbourhood selection being more important than within-study area  
497 selection suggests that our definition of a social neighbourhood as all individuals within  
498 130m reflects the level at which red squirrels compete for space and resources to recruit.  
499 Further, this is congruent with the work of Dantzer et al. (2012), who demonstrated that  
500 density within 150m was the most relevant measure in this system. Red squirrels can hear  
501 territorial vocalisations by others from up to 130m (Smith 1968), and mothers use these  
502 vocalisations to assess local density and increase the growth rate of their pups through

503 stress-mediated maternal effects (Dantzer et al. 2013). The within-neighbourhood scale did  
504 not correspond to a discrete and mutually exclusive 'group', but instead represented the  
505 unique interactions between each individual and its surrounding neighbours. We add to the  
506 results of Laiolo and Obeso (2012) to show that this form of selection can occur based on  
507 individually unique social environments, rather than discrete units such as a unique pair or  
508 colony (see also: Nunney 1985). For all territorial animals, and those that live in  
509 hierarchically structured populations, groups of competing or cooperating animals exist at  
510 different scales (Hill et al. 2008). These can be relatively clearly defined, such as a  
511 population containing distinct clans formed by discrete family units as found in sperm whales  
512 (*Physeter macrocephalus*; Cantor et al. 2015), or defined based on spatial scale as we have  
513 done in the current study. Therefore, multilevel selection may be widespread in situations  
514 where it has yet to be considered. Genetic relatedness within a social neighbourhood or  
515 IGEs among neighbours is required for among-neighbourhood selection to produce a  
516 response (Bijma and Wade 2008). Juvenile red squirrels typically do not disperse far from  
517 the natal nest (mean around 90m; Price and Boutin 1993; Larsen and Boutin 1994; Berteaux  
518 and Boutin 2000), which could lead to clusters of related individuals. Explicit calculation of  
519 this parameter will allow us to predict the response to this level of selection.

520

521 Study area density as an agent of selection on birth date

522 Our putative agent of selection, the density of the study area, was important in determining  
523 the strength of selection on birth date at the within-social neighbourhood level, and to a  
524 lesser extent the within-study area level, although not for growth rate at any level. Being born  
525 earlier than neighbouring litters increased survival, which was especially important when the  
526 study area was at a high density, but was less important when density was low. This  
527 strengthens the idea that an early birth date is selectively advantageous because it allows  
528 juveniles to locate vacant territories within their social neighbourhood.

529 While previous studies have shown that local density is often negatively related to  
530 fitness components (e.g. Coulson et al. 1997; Wilkin et al. 2006), we have identified a trait  
531 whose effects on fitness are mediated by population density (MacColl 2011; see also:  
532 Dantzer et al. 2013; Bouwhuis et al. 2015). Although our initial analysis suggested no  
533 consistent selection on birth date, adding population density to the model revealed both that  
534 early-born litters were more likely to recruit, and that this effect was stronger at higher  
535 densities. This is likely because there is among-year variation in the strength of selection,  
536 related to changes in population size (McAdam and Boutin 2003b), so by accounting for this  
537 we were able to detect the effect. Birth date is moderately heritable ( $h^2 = 0.16$ ; Réale et al.  
538 2003) and so as predicted by the breeder's equation should be advancing (Lande 1979).

539 However, despite initial results suggesting a genetic change occurred over a 10-year period  
540 (Réale et al. 2003b) additional data and a re-analysis indicated no change in birth date  
541 (Lane et al. *In rev*), which seems to be caused by selection acting on environmental  
542 deviations rather than the genetic basis to birth date.

543

#### 544 Selection on growth rate

545 In our analysis, population density was not an agent of selection on growth rate. Dantzer et  
546 al. (2013) previously found that a female's reproductive success was increased if her litter  
547 was fast growing when local density was high, but not when it was low, in contrast to our  
548 results. They used relative fitness rather than raw survival as their response variable, which  
549 shows higher variance when recruitment is lower, which occurs in high-density years. This  
550 may have enabled them to detect stronger selection on growth rate in high density years  
551 where we did not. In addition, Dantzer et al. (2013) also included litter size in their selection  
552 analysis, whereas we included only growth rate and birth date. The degree of competition for  
553 vacant territories depends on both the number of vacancies as well as the number of  
554 potential competitors (Taylor et al. 2014). While population density represents the inverse of  
555 territory vacancy rates, the number of juveniles competing for each vacant territory might  
556 also depend on the availability of food resources affecting the rate of offspring production.  
557 This mechanism remains to be tested.

558 Goodnight et al. (1992) stated that if both individual and group-level selection  
559 coefficients are the same, the selection is "hard". The absolute value of the individual's trait  
560 is selected upon, unrelated to the social environment, with the agent likely to be some  
561 environmental factor (Goodnight et al. 1992). Considering the selection coefficients were all  
562 the same direction for growth rate, and that population density did not greatly influence the  
563 strength of selection, selection on growth rate may act in this way. Possibly, faster growing  
564 pups are generally of higher "quality", and so more likely to survive over winter. This too is a  
565 mechanism that remains to be tested. Note that the overlapping CIs for the selection  
566 coefficients is not necessarily good evidence that selection at different scales is equivalent,  
567 as selection strengths fluctuate across years (McAdam and Boutin 2003b).

568 Although our standard selection analysis indicated strong selection on growth rate,  
569 some of this selection occurred at the within-study area level. Response to this selection  
570 requires genetic variance within-years (among-study areas), which we do not believe is  
571 likely. Therefore, this portion of the selection gradient will not contribute to any evolutionary  
572 response. This may be a common phenomenon, where standard selection analyses assume  
573 that all the selection measured is aligned with the available genetic variation. Our results  
574 suggest that might not be the case, which may contribute to the lack of evolutionary

575 response observed in populations where directional selection has been estimated on a  
576 heritable trait (Merilä et al. 2001). A thorough multilevel quantitative genetic analysis would  
577 be required, however, to completely determine how the scale of selection and the scale of  
578 genetic variation together affect rates of evolution of growth rates and birth dates.

579

580 Sex-specific selection at the level of the litter for growth rate

581 Combining multilevel and sex-specific selection revealed contrasting relationships within-  
582 litters for selection on growth rate. Females were under strong, positive selection within the  
583 litter, while males were under no selection at this level. Furthermore, females typically were  
584 more likely to recruit than males, a relatively common pattern in birds and mammals  
585 (Clutton-Brock et al. 1985), and one that has been detected previously in this system  
586 (LaMontagne et al. 2013). We suspect that selection was strong within-litters for females as  
587 red squirrel mothers sometimes (19% of mothers; Lane et al. 2015) bequeath their territory,  
588 or part of it, to one of their offspring (Price and Boutin 1993; Larsen and Boutin 1994), and  
589 this offspring is most commonly a daughter (Berteaux and Boutin 2000). If squirrels do  
590 disperse from the natal territory, the distance of settlement is not typically very large (see  
591 above), and does not differ between the sexes (Cooper et al. *In rev*). Therefore, growing  
592 more quickly than its littermates to obtain a larger size is perhaps important for a female  
593 squirrel to out-compete its littermates for either the natal territory, or one of the (likely few)  
594 available territories near to the nest. As bequeathal is biased towards females, fast growing  
595 males may have no better chance of acquiring the natal territory than slower growing males,  
596 as the territory tends to go to a female regardless. This may explain the lack of selection for  
597 growth rate in males within-litters. Berteaux and Boutin (2000) found that individuals having  
598 a territory bequeathed to them were not heavier than those that did not, however this was a  
599 population-level analysis, with a smaller sample size than ours, and so may have failed to  
600 identify this level of within-litter competition. Alternatively, fast-growing females may have  
601 been smaller at birth, but grew more quickly than their siblings. This, however, would oppose  
602 the general pattern that individuals that experience catch-up growth suffer reduced longevity  
603 (Lee et al. 2012). Young and Badyaev (2004) noted that sex-biased allocation of parental  
604 resources is more common when parents are limited in their ability to acquire or store  
605 resources. While red squirrels do not appear limited in their ability to store resources, in most  
606 years they will be strongly limited in their ability to acquire resources. In most years this is  
607 unlikely to be true. Sex-biased allocation of resources depends on changes in the cost  
608 differential of sons and daughters across different environments (Young and Badyaev 2004).  
609 Such a cost differential change is not obvious in red squirrels at present, but could be  
610 explicitly tested.

611 We note that the absolute growth rate of individuals did not differ between the sexes  
612 (1.73 and 1.75 g/d for females and males respectively; t-test,  $t = -0.821$ ,  $df = 2392$ ,  $p = 0.41$ ),  
613 suggesting this selection has not resulted in the evolution of sex-biased growth rates.  
614 Sexually antagonistic selection is quite common (Cox and Calsbeek 2009), for instance,  
615 some *Anolis* lizard species show sexual eco-morph divergence so that the sexes occupy  
616 different ecological niches (Butler et al. 2000, 2007), while body size in female yellow pine  
617 chipmunk (*Tamias amoenus*) was typically positively related to fitness, but was selectively  
618 neutral in males (Schulte-Hostedde et al. 2002). Sexually antagonistic selection is not  
619 necessarily absent in sexually monomorphic species such as the red squirrels, as a sex-  
620 specific response may not be possible (Cox and Calsbeek 2009). Although viability selection  
621 typically shows the least degree of sexual antagonism (Cox and Calsbeek 2009), we still  
622 found evidence for sexually antagonistic selection on recruitment. Similar results have been  
623 found in *Drosophila melanogaster*, where when selection on females is prevented,  
624 populations evolved towards a slower rate of growth that is favoured in males (Prasad et al.  
625 2007). Cox and Calsbeek (2009) noted that many studies either focus on only one sex, or  
626 pool the sexes, despite the fact that sexually antagonistic selection can strongly constrain  
627 evolution. Therefore, we can only agree with their assertion that more studies should look for  
628 sex-specific patterns of selection. Intriguingly, this sexually antagonistic selection was not  
629 apparent at any other level we considered or in previous individual-based selection analyses  
630 for these traits (e.g. McAdam and Boutin 2003b). Therefore, considering both sex-specific  
631 selection and multilevel selection simultaneously may be necessary in future selection  
632 analyses.

633

634 Selection on birth date is opposite at local scales vs. among-years

635 Offspring from litters born earlier than others in their social neighbourhood had an increased  
636 chance of recruitment, yet the among-year effect was in the opposite direction: years that  
637 have on average later birth dates had higher mean recruitment. This led to the standard  
638 selection analysis suggesting very limited selection on birth dates. This among-year effect is  
639 driven by annual variation in resource abundance. In most years, litters tend to be born later  
640 (Boutin et al. 2006). The recruitment in these years is then increased as there are far more  
641 resources available, allowing juveniles to create territories where there were none previously  
642 and cache food there, increasing survival over winter (McAdam and Boutin 2003b). We also  
643 note that selection on growth rates is stronger in the year *after* one of high cone abundance  
644 (i.e. after a mast year), likely due to high densities, but that episodes of strong selection are  
645 rare (McAdam and Boutin 2003b). Therefore, consistent within-year selection may not  
646 always be apparent if among-year variation is not accounted for. Among-year relationships  
647 between environmental conditions and reproductive dates alongside selection within each

648 year for these dates to shift earlier have been found in collared flycatchers (*F. albicollis*) and  
649 red deer (*Cervus elaphus*), where females alter reproductive dates based on local  
650 temperature or previous autumn rainfall respectively (Brommer et al. 2005; Nussey et al.  
651 2005). Therefore, the masking of within-year selective forces by among-year variance in  
652 environmental conditions may be common, and so controlling for it necessary when  
653 investigating selection (see also van de Pol and Wright 2009 for analogous within- and  
654 among-individual effects).

655

## 656 Conclusions

657 We have detected multilevel selection on recruitment in a natural population of red squirrels.  
658 Selection was typically strongest when considering all individuals within the acoustic social  
659 neighbourhood, although females also experienced strong within-litter selection on growth  
660 rate. We also found evidence that population density acted as an agent of selection on birth  
661 date during juvenile recruitment, but we found no evidence of density-dependent selection  
662 through growth rate. If, as our results suggest, interactions are strongest at the within-  
663 neighbourhood level, then evolutionary dynamics will strongly depend on traits and genetic  
664 parameters at this level, alongside the individual level (Goodnight et al. 1992; Bijma and  
665 Wade 2008). Our results highlight 1) the range of scales at which natural selection might act  
666 in a solitary organism, 2) how identifying the agent of selection helps us understand a  
667 system, 3) that sex-specific selection can occur only at particular levels of organisation, and  
668 4) coefficients of selection being in the same or opposite direction across levels may lead to  
669 the over- or under-estimation of selection. A better understanding of how natural selection  
670 acts across a range of scales will enhance our ability to understand and predict trait  
671 evolution in natural populations.

672

## 673 Acknowledgements

674 The authors are grateful for funding from the Natural Sciences and Engineering Research  
675 Council, the Northern Scientific Training Program, the National Science Foundation, and the  
676 Ontario Ministry of Research and Innovation. We thank Agnes Moose and her family for  
677 long-term access to her trapline, and to the Champagne and Aishihik First Nations for  
678 allowing us to conduct work on their land. We thank all the volunteers, field assistants and  
679 graduate students whose tireless work makes the KRSP possible. We have no conflicts of  
680 interest. This is KRSP paper number 83.

681



## 682 References

- 683 Arnold, S. 1983. Morphology , Performance and Fitness. *Am. Zool.* 361:347–361.
- 684 Berteaux, D., and S. Boutin. 2000. Breeding dispersal in female North American red  
685 squirrels. *Ecology* 81:1311–1326.
- 686 Biernaskie, J. M., and K. R. Foster. 2016. Ecology and multilevel selection explain  
687 aggression in spider colonies. *Ecol. Lett.* 19:873–879.
- 688 Bijma, P., W. M. Muir, and J. A. M. Van Arendonk. 2007. Multilevel selection 1: Quantitative  
689 genetics of inheritance and response to selection. *Genetics* 175:277–88.
- 690 Bijma, P., and M. J. Wade. 2008. The joint effects of kin, multilevel selection and indirect  
691 genetic effects on response to genetic selection. *J. Evol. Biol.* 21:1175–88.
- 692 Björklund, M., and L. Gustafsson. 2013. The importance of selection at the level of the pair  
693 over 25 years in a natural population of birds. *Ecol. Evol.* 3:4610–4619.
- 694 Bolker, B. 2012. *coefplot2*.
- 695 Boutin, S., L. A. Wauters, A. McAdam, M. Humphries, G. Tosi, and A. Dhondt. 2006.  
696 Anticipatory reproduction and population growth in seed predators. *Science* (80-. ).  
697 314:1928–1930.
- 698 Bouwhuis, S., O. Vedder, C. J. Garroway, and B. C. Sheldon. 2015. Ecological causes of  
699 multilevel covariance between size and first-year survival in a wild bird population. *J.*  
700 *Anim. Ecol.* 84:208–218.
- 701 Brommer, J. E., J. Merilä, B. C. Sheldon, and L. Gustafsson. 2005. Natural selection and  
702 genetic variation for reproductive reaction norms in a wild bird population. *Evolution* (N.  
703 Y). 59:1362–1371.
- 704 Butler, M. A., S. A. Sawyer, and J. B. Losos. 2007. Sexual dimorphism and adaptive  
705 radiation in Anolis lizards. *Nature* 447:202–205.
- 706 Butler, M. A., T. W. Schoener, and J. B. Losos. 2000. The relationship between sexual size  
707 dimorphism and habitat use in Greater Antillean Anolis lizards. *Evolution* 54:259–72.
- 708 Cantor, M., L. G. Shoemaker, R. B. Cabral, C. O. Flores, M. Varga, and H. Whitehead. 2015.  
709 Multilevel animal societies can emerge from cultural transmission. *Nat. Commun.*  
710 6:8091.
- 711 Clutton-Brock, T. H., S. D. Albon, and F. E. Guinness. 1985. Parental investment and sex  
712 differences in juvenile mortality in birds and mammals. *Nature* 313:131–133.
- 713 Coulson, T., S. Albon, F. Guinness, J. Pemberton, and T. Clutton-Brock. 1997. Population  
714 substructure, local density, and calf winter survival in red deer (*Cervus elaphus*).  
715 *Ecology* 78:852–863. Ecological Society of America.
- 716 Cox, R. M., and R. Calsbeek. 2009. Sexually antagonistic selection, sexual dimorphism, and  
717 the resolution of intralocus sexual conflict. *Am. Nat.* 173:176–187.
- 718 Dantzer, B., S. Boutin, M. M. Humphries, and A. G. McAdam. 2012. Behavioral responses of  
719 territorial red squirrels to natural and experimental variation in population density.  
720 *Behav. Ecol. Sociobiol.* 66:865–878.
- 721 Dantzer, B., A. E. M. Newman, R. Boonstra, R. Palme, S. Boutin, M. M. Humphries, and A.  
722 G. McAdam. 2013. Density Triggers Maternal Hormones That Increase Adaptive  
723 Offspring Growth in a Wild Mammal. *Science* (80-. ). 340:1215–1217.
- 724 Eldakar, O. T., M. J. Dlugos, J. W. Pepper, and D. S. Wilson. 2009. Population structure  
725 mediates sexual conflict in water striders. *Science* 326:816.
- 726 Eldakar, O., D. Wilson, M. Dlugos, and J. Pepper. 2010. The role of multilevel selection in  
727 the evolution of sexual conflict in the water strider *Aquarius remigis*. *Evolution* (N. Y).  
728 Endler, J. A. 1986. *Natural selection in the wild*. Princeton University Press.
- 729 Falconer, D. 1981. *Introduction to Quantitative Genetics*. The Ronald Press Company, New  
730 York.
- 731 Gardner, A. 2015. The genetical theory of multilevel selection. *J. Evol. Biol.* 28:305–19.
- 732 Goodnight, C. J. 2015. Multilevel selection theory and evidence: a critique of Gardner, 2015.  
733 *J. Evol. Biol.* 28:1734–46.
- 734 Goodnight, C. J., J. M. Schwartz, and L. Stevens. 1992. Contextual analysis of models of  
735 group selection , soft selection, hard selection, and the evolution of altruism. *Am. Nat.*

- 736 140:743–761.
- 737 Goodnight, C. J., and L. Stevens. 1997. Experimental Studies of Group Selection: What Do  
738 They Tell US About Group Selection in Nature? *Am. Nat.* 150:S59–S79.
- 739 Grafen, A. 1984. Natural selection, kin selection and group selection.
- 740 Hadfield, J. D. 2010. MCMC methods for multi-response generalized linear mixed models:   
741 The MCMCglmm R package. *J. Stat. Softw.* 33:1–22.
- 742 Heisler, I. L., and J. Damuth. 1987. A Method for Analyzing Selection in Hierarchically  
743 Structured Populations. *Am. Nat.* 130:582.
- 744 Hill, R. A., R. A. Bentley, and R. I. M. Dunbar. 2008. Network scaling reveals consistent  
745 fractal pattern in hierarchical mammalian societies. *Biol. Lett.* 4:748–51.
- 746 Janzen, F. J., and S. Stern, Hal. 1998. Logistic regression for empirical studies of  
747 multivariate selection. *Evolution (N. Y.)*. 52:1564–1571.
- 748 Kelly, D. 1994. The evolutionary ecology of mast seeding. *Trends Ecol. Evol.* 9:465–470.
- 749 Kingsolver, J. G., H. E. Hoekstra, J. M. Hoekstra, D. Berrigan, S. N. Vignieri, C. E. Hill, A.  
750 Hoang, P. Gibert, and P. Beerli. 2001. The strength of phenotypic selection in natural  
751 populations. *Am. Nat.* 157:245–261. The University of Chicago Press.
- 752 Laiolo, P., and J. R. Obeso. 2012. Multilevel selection and neighbourhood effects from  
753 individual to metapopulation in a wild passerine. *PLoS One* 7:e38526.
- 754 Lamontagne, J. M., and S. Boutin. 2007. Local-scale synchrony and variability in mast seed  
755 production patterns of *Picea glauca*. *J. Ecol.* 95:991–1000. Blackwell Publishing Ltd.
- 756 LaMontagne, J. M., C. T. Williams, J. L. Donald, M. M. Humphries, A. G. McAdam, and S.  
757 Boutin. 2013. Linking intraspecific variation in territory size, cone supply, and survival of  
758 North American red squirrels. *J. Mammal.* 94:1048–1058. American Society of  
759 Mammalogists.
- 760 Lande, R. 1979. Quantitative genetic analysis of multivariate evolution , applied to brain   
761 body size allometry. *Evolution (N. Y.)*. 33:402–416.
- 762 Lande, R., and S. Arnold. 1983. The measurement of selection on correlated characters.
- 763 Lane, J. E., A. G. McAdam, A. Charmantier, M. M. Humphries, D. W. Coltman, Q. Fletcher,  
764 J. C. Gorrell, and S. Boutin. 2015. Post-weaning parental care increases fitness but is  
765 not heritable in North American red squirrels. *J. Evol. Biol.* 28:1203–12.
- 766 Larsen, K. W., and S. Boutin. 1994. Movements, survival, and settlement of red squirrel  
767 (*Tamiasciurus hudsonicus*) offspring. *Ecology* 75:214–223.
- 768 Lee, W.-S., P. Monaghan, and N. B. Metcalfe. 2012. Experimental demonstration of the  
769 growth rate–lifespan trade-off. *Proc. R. Soc. London B Biol. Sci.* 280.
- 770 Lush, J. 1937. *Animal Breeding Plans*. Iowa State College Press, Ames, Iowa.
- 771 MacColl, A. D. C. 2011. The ecological causes of evolution. *Trends Ecol. Evol.* 26:514–522.
- 772 Mcadam, A. G., and S. Boutin. 2004. Maternal effects and the response to selection in red  
773 squirrels. *Proc. R. Soc. B Biol. Sci.* 271:75–79. The Royal Society.
- 774 McAdam, A. G., and S. Boutin. 2003a. Effects of food abundance on genetic and maternal  
775 variation in the growth rate of juvenile red squirrels. *J. Evol. Biol.* 16:1249–1256.  
776 Blackwell Science Ltd.
- 777 McAdam, A. G., and S. Boutin. 2003b. Variation in viability selection among cohorts of  
778 juvenile red squirrels (*Tamiasciurus hudsonicus*). *Evolution* 57:1689–1697. Blackwell  
779 Publishing Ltd.
- 780 McAdam, A. G., S. Boutin, D. Réale, and D. Berteaux. 2002. Maternal effects and the  
781 potential for evolution in a natural population of animals. *Evolution* 56:846–851.
- 782 McAdam, A. G., S. Boutin, A. K. Sykes, and M. M. Humphries. 2007. Life histories of female  
783 red squirrels and their contributions to population growth and lifetime fitness.  
784 *Ecoscience* 14:362.
- 785 McFarlane, S. E., J. C. Gorrell, D. W. Coltman, M. M. Humphries, S. Boutin, and A. G.  
786 McAdam. 2015. The nature of nurture in a wild mammal's fitness. *Proc. R. Soc. B Biol.*  
787 *Sci.* 282:20142422–20142422.
- 788 McGlothlin, J. W., A. J. Moore, J. B. Wolf, and E. D. Brodie. 2010. Interacting phenotypes  
789 and the evolutionary process. III. Social evolution. *Evolution* 64:2558–74.
- 790 Merilä, J., B. C. Sheldon, and L. E. Kruuk. 2001. Explaining stasis: microevolutionary studies

- 791 in natural populations. *Genetica* 112–113:199–222.
- 792 Mousseau, T., and C. Fox. 1998. The adaptive significance of maternal effects. *Trends Ecol.*  
793 *Evol.*
- 794 Muir, W. M., P. Bijma, and A. Schinckel. 2013. Multilevel selection with kin and non-kin  
795 groups, experimental results with japanese quail (*coturnix japonica*). *Evolution* (N. Y).  
796 67:1598–1606.
- 797 Nakagawa, S., and H. Schielzeth. 2013. A general and simple method for obtaining R<sup>2</sup> from  
798 generalized linear mixed-effects models. *Methods Ecol. Evol.* 4:133–142.
- 799 Nunney, L. 1985. Group selection, altruism, and structured-deme models. *Am. Nat.*  
800 126:212–230.
- 801 Nussey, D. H., T. H. Clutton-Brock, D. A. Elston, S. D. Albon, and L. E. B. Kruuk. 2005.  
802 Phenotypic plasticity in a maternal trait in red deer. *J. Anim. Ecol.* 74:387–396.  
803 Blackwell Science Ltd.
- 804 Page, R. E., and M. K. Fondrk. 1995. The effects of colony-level selection on the social  
805 organization of honey bee (*Apis mellifera* L.) colonies: colony-level components of  
806 pollen hoarding. *Behav. Ecol. Sociobiol.* 36:135–144. Springer-Verlag.
- 807 Prasad, N. G., S. Bedhomme, T. Day, and A. K. Chippindale. 2007. An evolutionary cost of  
808 separate genders revealed by male-limited evolution. *Am. Nat.* 169:29–37.
- 809 Price, G. R. 1970. Selection and covariance. Nature Publishing Group.
- 810 Price, K., and S. Boutin. 1993. Territorial bequathal by red squirrel mothers. *Behav. Ecol.*  
811 4:144–155. Oxford University Press.
- 812 Queller, D. C. 1992. Quantitative genetics, inclusive fitness, and group selection. *Am. Nat.*  
813 139:540.
- 814 R Development Core Team, R. 2016. R: A language and environment for statistical  
815 computing. R Foundation for Statistical Computing, Vienna, Austria.
- 816 Réale, D., D. Berteaux, A. G. McAdam, and S. Boutin. 2003a. Lifetime selection on heritable  
817 life-history traits in a natural population of red squirrels. *Evolution* (N. Y). 57:2416–2423.
- 818 Réale, D., A. G. McAdam, S. Boutin, and D. Berteaux. 2003b. Genetic and plastic responses  
819 of a northern mammal to climate change. *Proc. Biol. Sci.* 270:591–596.
- 820 Robertson, A. 1966. A mathematical model of the culling process in dairy cattle. *Anim. Prod.*  
821 8:95–108. Cambridge University Press.
- 822 Royle, N. J., N. J. Royle, I. R. Hartley, I. R. Hartley, I. P. F. Owens, I. P. F. Owens, G. A.  
823 Parker, and G. A. Parker. 1999. Sibling competition and the evolution of growth rates in  
824 birds. *Proc. R. Soc. Lond. B* 266:923–932.
- 825 Schielzeth, H. 2010. Simple means to improve the interpretability of regression coefficients.  
826 *Methods Ecol. Evol.* 1:103–113.
- 827 Schulte-Hostedde, A. I., J. S. Millar, and H. L. Gibbs. 2002. Female-biased sexual size  
828 dimorphism in the yellow-pine chipmunk (*Tamias amoenus*): sex-specific patterns of  
829 annual reproductive success and survival. *Evolution* 56:2519–29.
- 830 Siepielski, A. M., J. D. Dibattista, and S. M. Carlson. 2009. It's about time: The temporal  
831 dynamics of phenotypic selection in the wild. Blackwell Publishing Ltd.
- 832 Siepielski, A. M., K. M. Gotanda, M. B. Morrissey, S. E. Diamond, J. D. DiBattista, and S. M.  
833 Carlson. 2013. The spatial patterns of directional phenotypic selection. *Ecol. Lett.*  
834 16:1382–1392.
- 835 Smith, B. R., and D. T. Blumstein. 2008. Fitness consequences of personality: a meta-  
836 analysis. *Behav. Ecol.* 19:448–455. Oxford University Press.
- 837 Smith, C. C. 1978. Structure and function of the vocalizations of tree squirrels  
838 (*Tamiasciurus*). *J. Mammal.* 59:793–808. The Oxford University Press.
- 839 Smith, C. C. 1968. The adaptive nature of social organization in the genus of three squirrels  
840 *Tamiasciurus*. *Ecol. Monogr.* 38:31–64. Ecological Society of America.
- 841 Stevens, L., C. J. Goodnight, and S. Kalisz. 1995. Multilevel Selection in Natural Populations  
842 of *Impatiens capensis*. *Am. Nat.* 145:513–526. University of Chicago Press .
- 843 Taylor, R. W., S. Boutin, M. M. Humphries, and A. G. McAdam. 2014. Selection on female  
844 behaviour fluctuates with offspring environment. *J. Evol. Biol.* 27:2308–21.
- 845 Thomson, C. E., F. Bayer, M. Cassinello, N. Crouch, E. Heap, E. Mittell, and J. D. Hadfield.

- 846           2017. Selection on parental performance opposes selection for larger body size in a  
847           wild population of blue tits. *Evolution* (N. Y). 71:716–732.
- 848   van de Pol, M., and J. Wright. 2009. A simple method for distinguishing within- versus  
849           between-subject effects using mixed models. *Anim. Behav.* 77:753–758.
- 850   van Veelen, M., J. García, M. W. Sabelis, and M. Egas. 2012. Group selection and inclusive  
851           fitness are not equivalent; the Price equation vs. models and statistics. *J. Theor. Biol.*  
852           299:64–80.
- 853   Werschkul, D. F., and J. A. Jackson. 1979. Sibling competition and avian growth rates. *Ibis*  
854           (Lond. 1859). 121:97–102. Blackwell Publishing Ltd.
- 855   Wickham, H. 2009. *ggplot2: elegant graphics for data analysis*. Springer New York, New  
856           York.
- 857   Wilkin, T. A., D. Garant, A. G. Gosler, and B. C. Sheldon. 2006. Density effects on life-  
858           history traits in a wild population of the great tit *Parus major*: Analyses of long-term data  
859           with GIS techniques. *J. Anim. Ecol.* 75:604–615. Blackwell Publishing Ltd.
- 860   Williams, C. T., J. E. Lane, M. M. Humphries, A. G. McAdam, and S. Boutin. 2014.  
861           Reproductive phenology of a food-hoarding mast-seed consumer: resource- and  
862           density-dependent benefits of early breeding in red squirrels. *Oecologia* 174:777–788.  
863           Springer Berlin Heidelberg.
- 864   Wolf, J. B., E. D. Brodie III, J. M. Cheverud, A. J. Moore, and M. J. Wade. 1998. Evolutionary  
865           consequences of indirect genetic effects. *Trends Ecol. Evol.* 13:64–69.
- 866   Wolf, J. B., E. D. Brodie III, and A. J. Moore. 1999. Interacting Phenotypes and the  
867           Evolutionary Process. II. Selection Resulting from Social Interactions. *Am. Nat.*  
868           153:254–266.
- 869   Young, R. L., and A. V. Badyaev. 2004. Evolution of sex-biased maternal effects in birds: I.  
870           Sex-specific resource allocation among simultaneously growing oocytes. *J. Evol. Biol.*  
871           17:1355–1366. Blackwell Science Ltd.
- 872
